# Supplementary material
Source: PubMed Central journal article supplement (PMC8672282)
Supplement: EMBJ-40-e108080-s004.pdf [file EMBJ-40-e108080-s004.pdf]

**SNX10-dependent LPS sensing by caspase-5 and resulting Lyn signaling causes gut barrier dysfunction**

**Wang *et al.***

**Short title:** Role of SNX10 in gut barrier function

**Address for Correspondence:**

**Xiaoyan Shen, MD, PhD;** Department of Pharmacology & the Key Laboratory of Smart Drug Delivery, Ministry of Education, School of Pharmacy, Fudan University, No. 826, Zhangheng Road, Shanghai 201203, China. Tel./Fax: +86-21-51980182, E-mail: [shxiaoy@fudan.edu.cn](mailto:shxiaoy@fudan.edu.cn)

**Weixing Shen, MD, PhD;** The First Clinical Medical College of Nanjing University of Chinese Medicine, Jiangsu Collaborative Innovation Center of Traditional Chinese Medicine Prevention and Treatment of Tumor, 138 Xianling AVE., Nanjing, Jiangsu, 210023, China, E-mail: [weixingshen@njucm.edu.cn](mailto:weixingshen@njucm.edu.cn)

**Hua Zhou, PhD;** Faculty of Chinese Medicine and State Key Laboratory of Quality Research in Chinese Medicine, Macau University of Science and Technology, Taipa, Macao, P.R. China. E-mail: [hzhou@must.edu.mo](mailto:hzhou@must.edu.mo).

**Table of content:**

1. **Page 2-8:** Appendix figures with legends S1-7
2. **Page 9-10:** Supplementary methods

## Appendix Figures and Legends

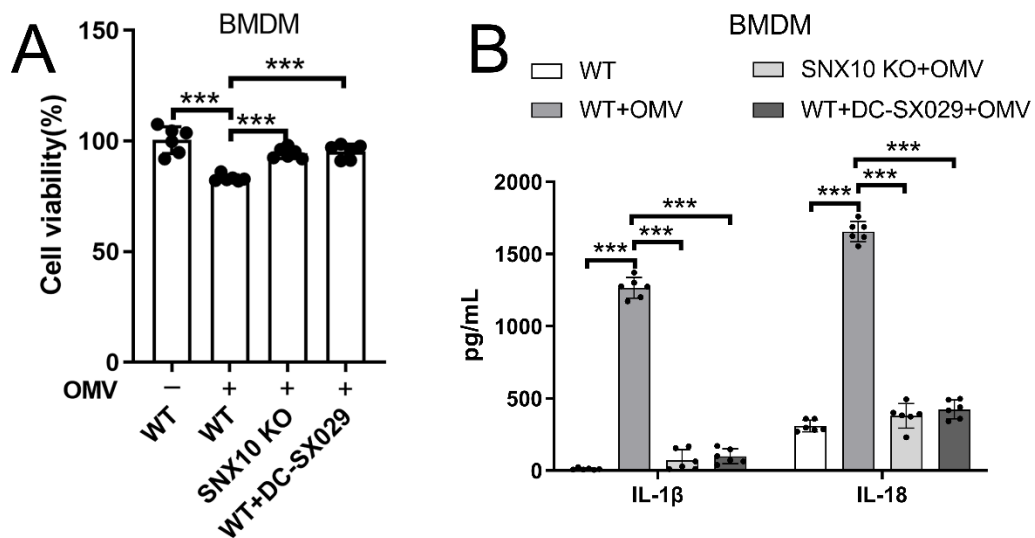

**Appendix figure S1. SNX10 KO or DC-SX029 increased the cell viability and inhibited the secretion of IL-1 $\beta$  and IL-18 in OMV-treated BMDMs**

A and B SNX10 deficient BMDMs or WT BMDMs treated with DC-SX029 were stimulated with OMVs (100  $\mu$ g/mL) for 24 h, the cell viability (A) was detected by Cell Counting Kit-8 (CCK-8), and IL-1 $\beta$  and IL-18 secretion (B) was detected by ELISA. n = 6 independent experiments.

Data information: Data are means  $\pm$  SD. One-way ANOVA followed by Bonferroni post hoc test for multiple comparisons were utilized for statistical analyses. \*\*\*p < 0.001.

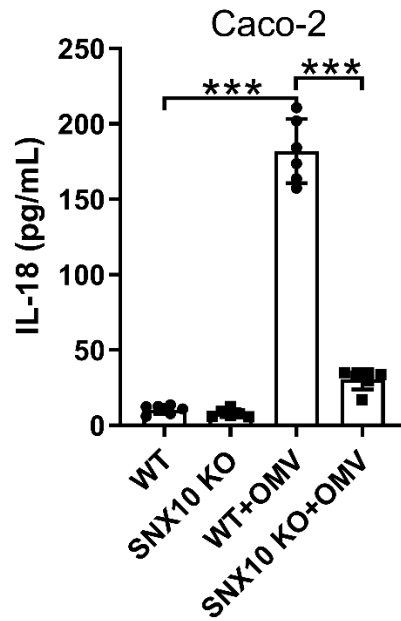

**Appendix figure S2. SNX10 KO inhibited the secretion of IL-18 in OMV-treated Caco-2 cells**

IL-18 secretion by Caco-2 cells stimulated with OMVs (100 µg/mL) for 24 h under SNX10 deficiency was detected by ELISA (n = 6 independent experiments).

Data information: Data are means ± SD. One-way ANOVA followed by Bonferroni post hoc test for multiple comparisons were utilized for statistical analyses. \*\*\*p < 0.001.

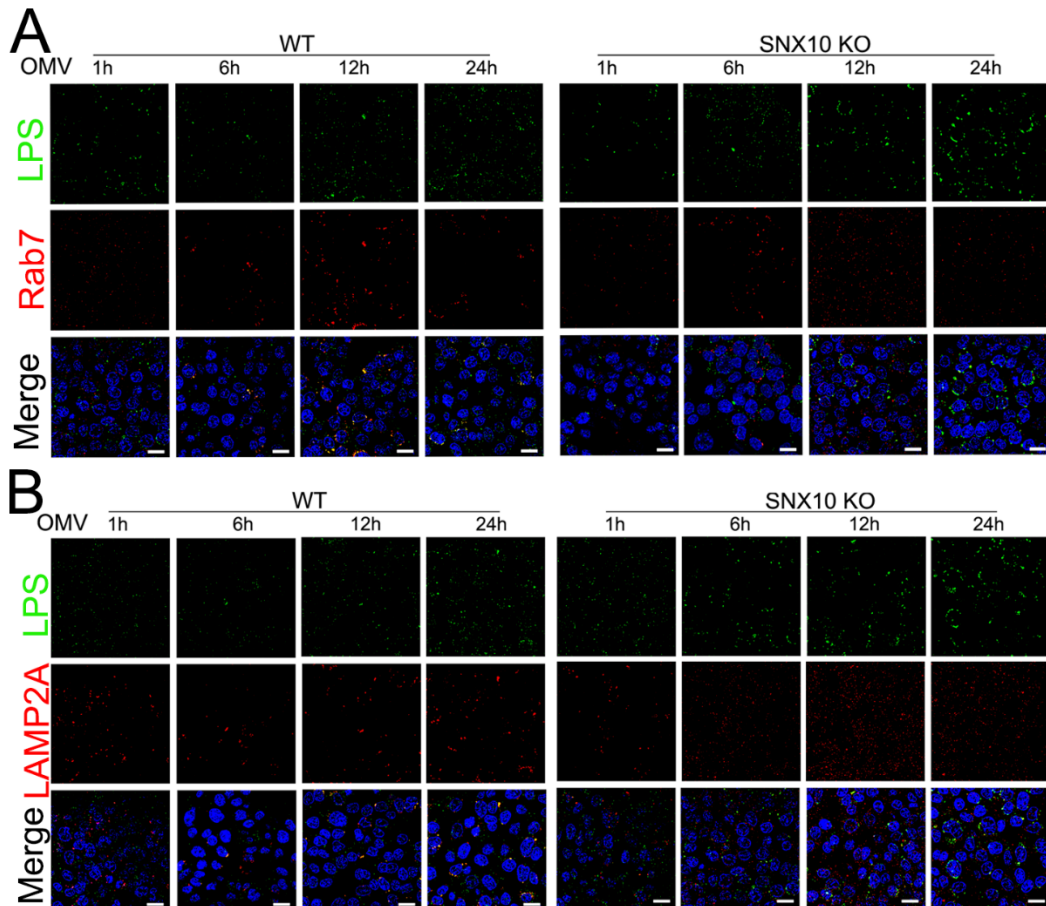

**Appendix figure S3. The distribution of the cytoplasmic LPS versus later endosome marker Rab7 and lysosome marker LAMP2A**

A and B WT and SNX10 KO Caco-2 cells were treated with OMVs (100  $\mu\text{g}/\text{mL}$ ) for the indicated time and stained with antibodies against LPS and Rab7 (A) or LAMP2A (B). Scale bar: 20  $\mu\text{m}$ .

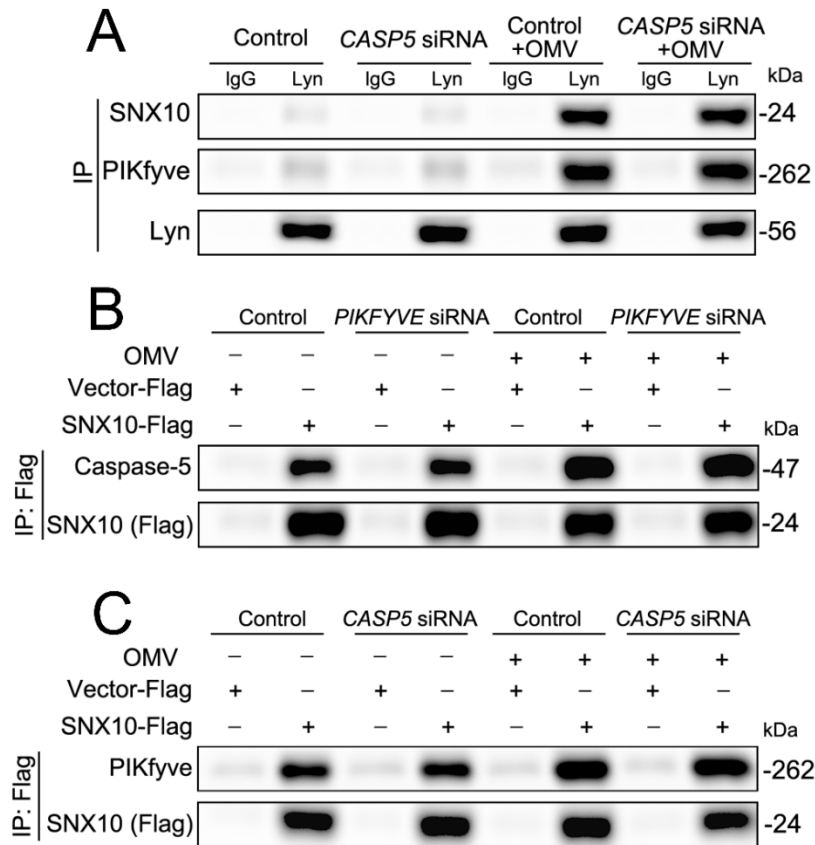

**Appendix figure S4. The interaction of SNX10 with Lyn, caspase-5 or PIKfyve**

- A Caco-2 cells transfected with control siRNA or *CASP5* siRNA were treated with or without OMVs (100 µg/mL) for 24h and then subjected to IP with anti-Lyn antibody.
- B After transfected with control siRNA or *PIKFYVE* siRNA, SNX10-Flag transfected Caco-2 cells were treated with or without OMVs (100 µg/mL) for 24 h, and the cell lysates were subjected to IP.
- C After transfected with control siRNA or *CASP5* siRNA, SNX10-Flag transfected Caco-2 cells were treated with or without OMVs (100 µg/mL) for 24 h, and the cell lysates were subjected to IP.



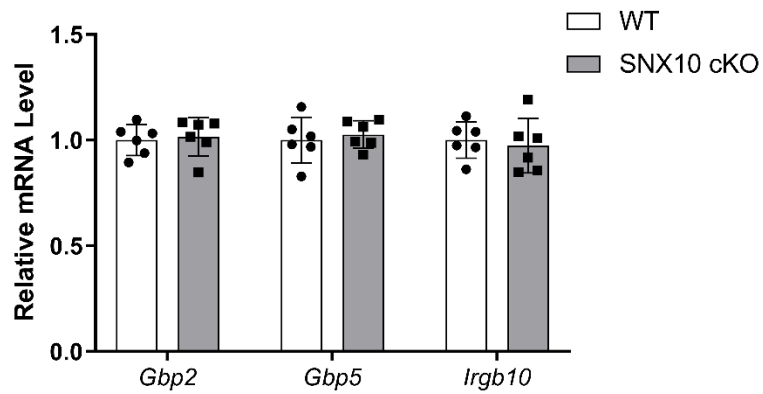

**Appendix figure S6. Effects of SNX10 deficiency on the expression of GBPs and IRGB10**

The relative mRNA levels of *Gbp2*, *Gbp5* and *Irgb10* in colon epithelial tissues of WT and SNX10 cKO mice were measured (n = 6 animals, each group).

Data information: Data are means ± SD. One-way ANOVA followed by Bonferroni post hoc test for multiple comparisons were utilized for statistical analyses.



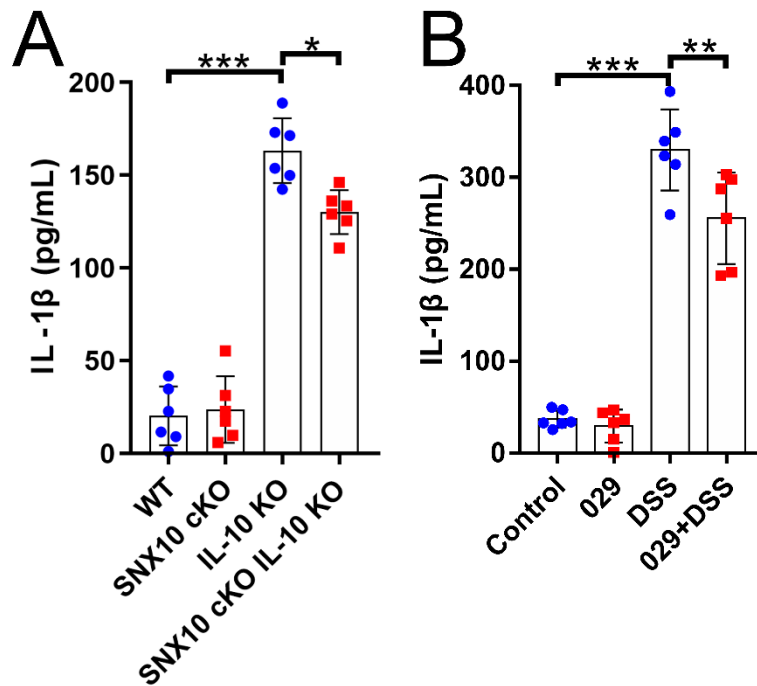

**Appendix figure S7. Targeting SNX10 inhibited the secretion of IL-1 $\beta$  in the serum of mice with IL-10 deficiency-induced or DSS-induced colitis**

**A** The content of IL-1 $\beta$  in the serum of WT, SNX10 cKO, IL-10 KO and SNX10 cKO IL-10 KO mice at the 16<sup>th</sup> week were measured by ELISA (n = 6 animals, each group).

**B** The content of IL-1 $\beta$  in the serum of mice induced by DSS with or without DC-SX029 (2 mg/kg/day) were measured by ELISA at day 7 (n = 6 animals, each group).

Data information: Data are means  $\pm$  SD. One-way ANOVA followed by Bonferroni post hoc test for multiple comparisons were utilized for statistical analyses. \*p < 0.05; \*\*p < 0.01; \*\*\*p < 0.001.

## Supplementary Methods

### The production of the *Snx10* floxed mice

*Snx10* floxed mice and *Vil1-cre* mice were purchased from Shanghai Research Center for Model Organisms (Shanghai, China). Mice containing the *Snx10*-flox (flanked by loxP) gene were established by inserting a homozygous loxP fragment into exon 4 and exon 5 of the mouse *Snx10* gene (Appendix Fig S5A), and then crossed them with *Vil1-cre* mice to obtain *Snx10*-flox homozygous (*Snx10<sup>f/f</sup>*) *Vil1-cre* positive mice, in which the intestinal epithelium-specific Villin1 (*Vil1*) promoter can control Cre enzyme expression restricted to the intestinal epithelium, resulting in the specific knockout of the *Snx10* gene in the intestinal epithelium.

The *Snx10* gene was modified by flox using homologous recombination in fertilized eggs, and the specific strategy is shown in Appendix Fig S5A. The process was as follows: Cas9 mRNA and gRNA were obtained by in vitro transcription; the homologous recombination vector (donor vector) was constructed by In-Fusion cloning. Cas9 mRNA, gRNA and homologous recombinant vector (Appendix Fig S5B) were microinjected into the fertilized eggs of C57BL/6J mice, and F0 generation mice were obtained by microinjection of fertilized eggs. The genotypes were identified by long fragment PCR and the PCR products were sequenced. F1 generation mice (*Snx10<sup>f/+</sup>*) were obtained by crossing F0 generation mice with wild-type C57BL/6J mice.

The target gene *Snx10* sequence was obtained from Mouse Genome Informatics (MGI) library, number 1919232; the transcript targeted by the protocol is *Snx10*-001, Ensembl number ENSMUST00000049152; loxP is inserted at both ends of exons 4 and 5.

Intron3 target sequence:

ggagggccatgccacccagggttaacactgctcattcctgtcgtcatggcttctt

The guide RNA (gRNA) target sequences:

Guide #1 GAATGAGCAGTGTTAGCCCT GGG

Guide #2 GAGCAGTGTTAGCCCTGGGT GGG

Intron5 target sequence: gtctcttaagagcacagtagatacagcgccagcatacacatctgaggcaggag

The guide RNA (gRNA) target sequences:

Guide #3 CCTGCCTCAGATGTGTATGC TGG

Guide #4 AGCGCCAGCATAACATCTG AGG

*Vil1-cre* mice can specifically knockout/recombine the target gene contained in the flox fragment by Vill promoter-driven expression of Cre recombinase in epithelial cells of the small and large intestine. Crosses between the two mice yielded the intestinal epithelial cell *Snx10* gene conditional knockout mice *Vil1-cre<sup>+</sup>Snx10<sup>fl/fl</sup>* (SNX10 cKO), and negative control mice *Vil1-cre<sup>-</sup>Snx10<sup>fl/fl</sup>* (WT).
