# Supplementary material
Source: PubMed Central journal article supplement (PMC8672282)

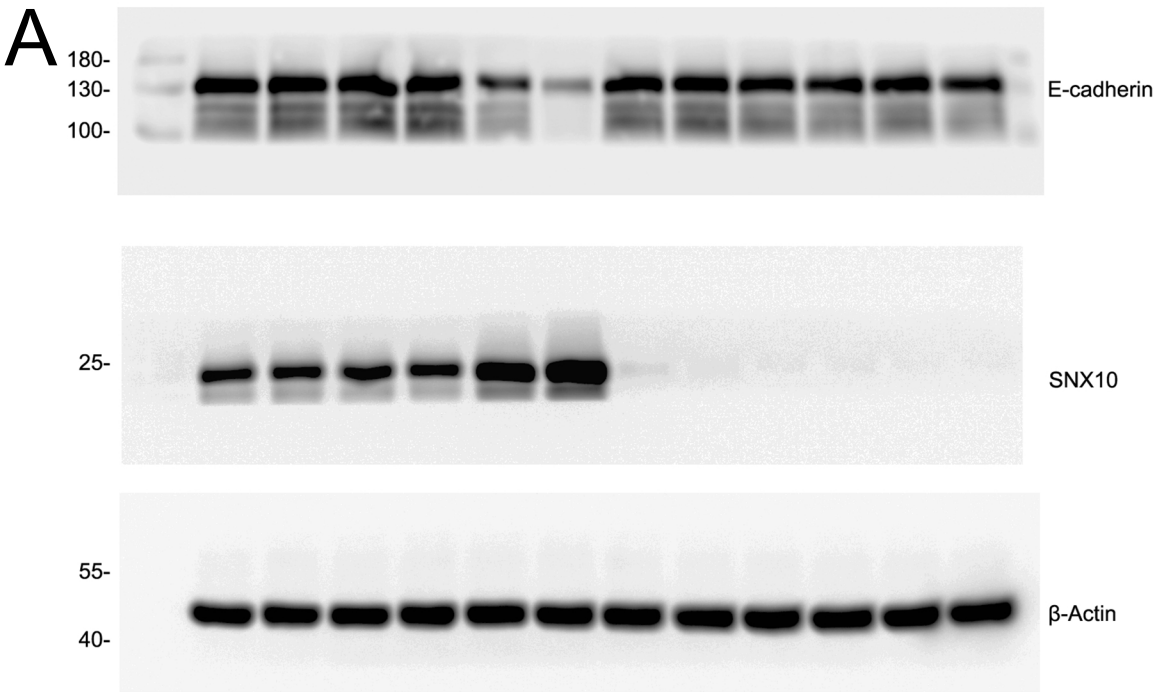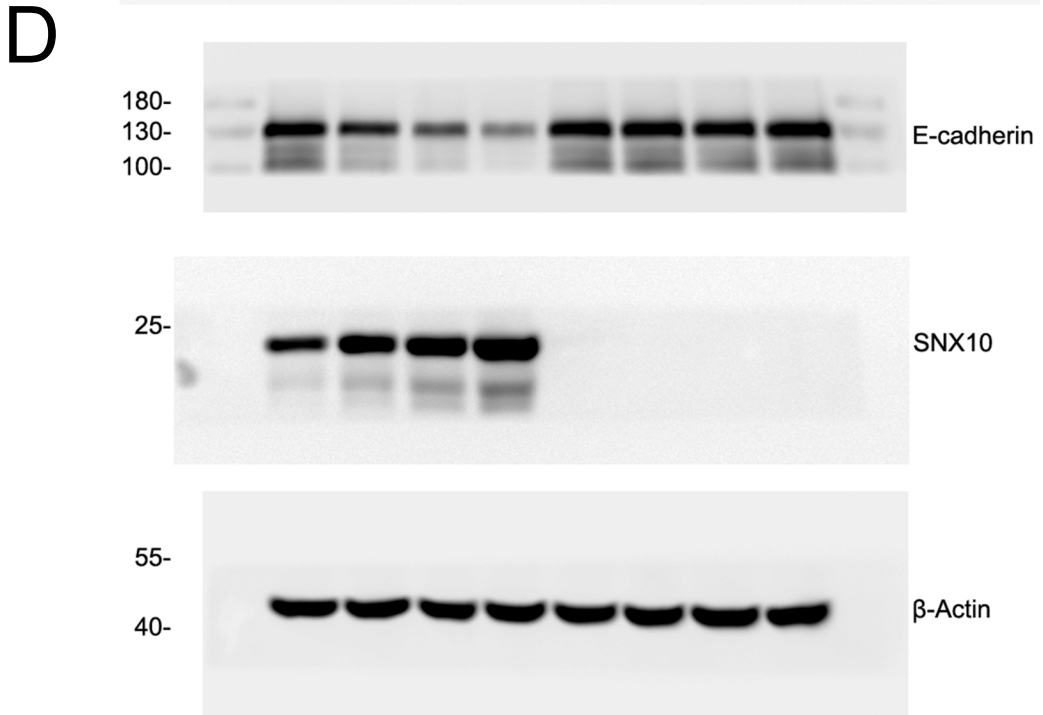

**Figure 1**

Supplement: EMBJ-40-e108080-s002.pdf [file EMBJ-40-e108080-s002.pdf]

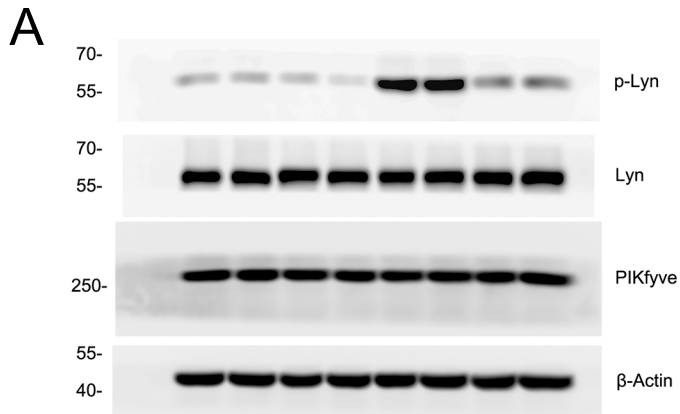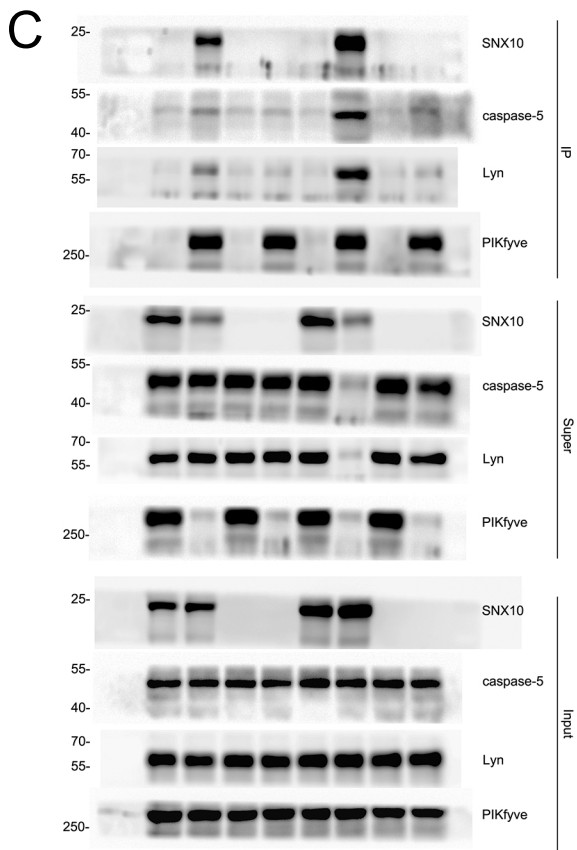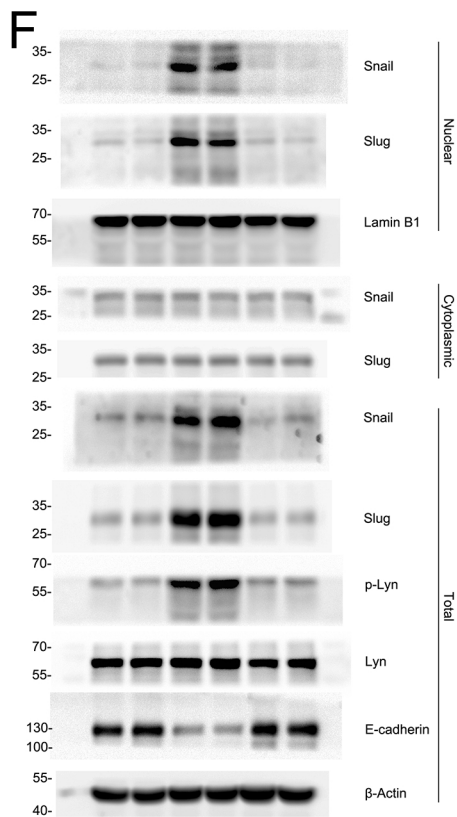

**Figure 6**

Supplement: EMBJ-40-e108080-s006.pdf [file EMBJ-40-e108080-s006.pdf]

**C**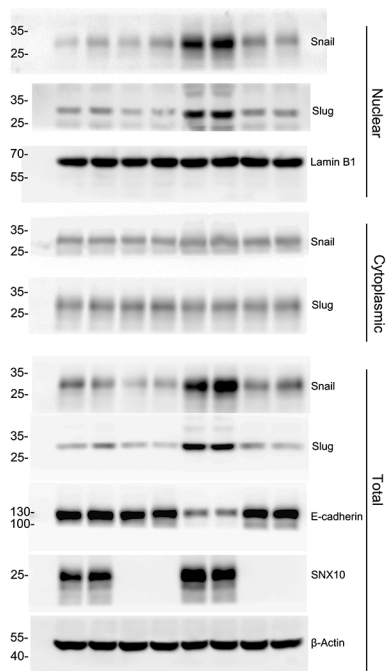**G**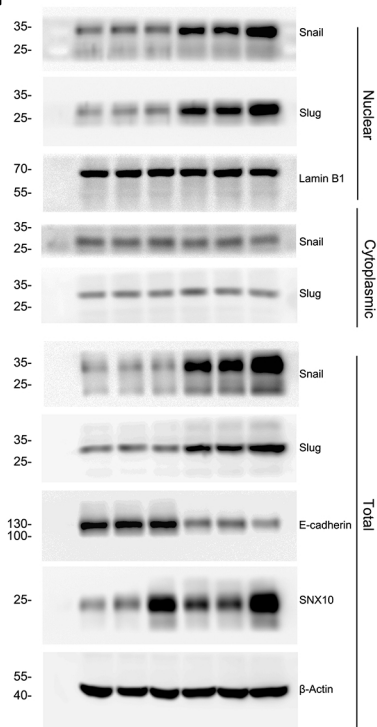**H**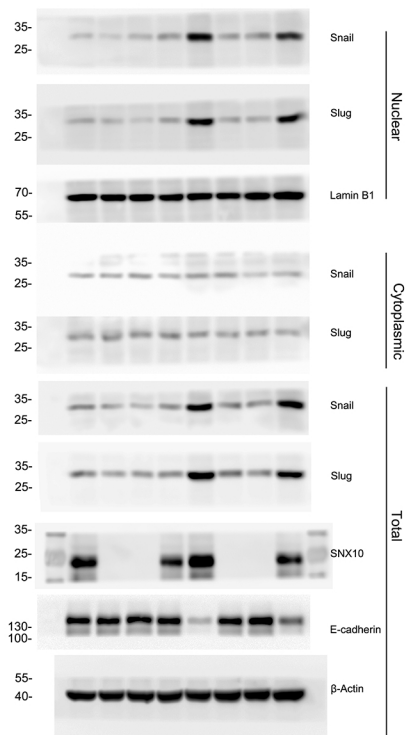**Figure 2**

Supplement: EMBJ-40-e108080-s007.pdf [file EMBJ-40-e108080-s007.pdf]

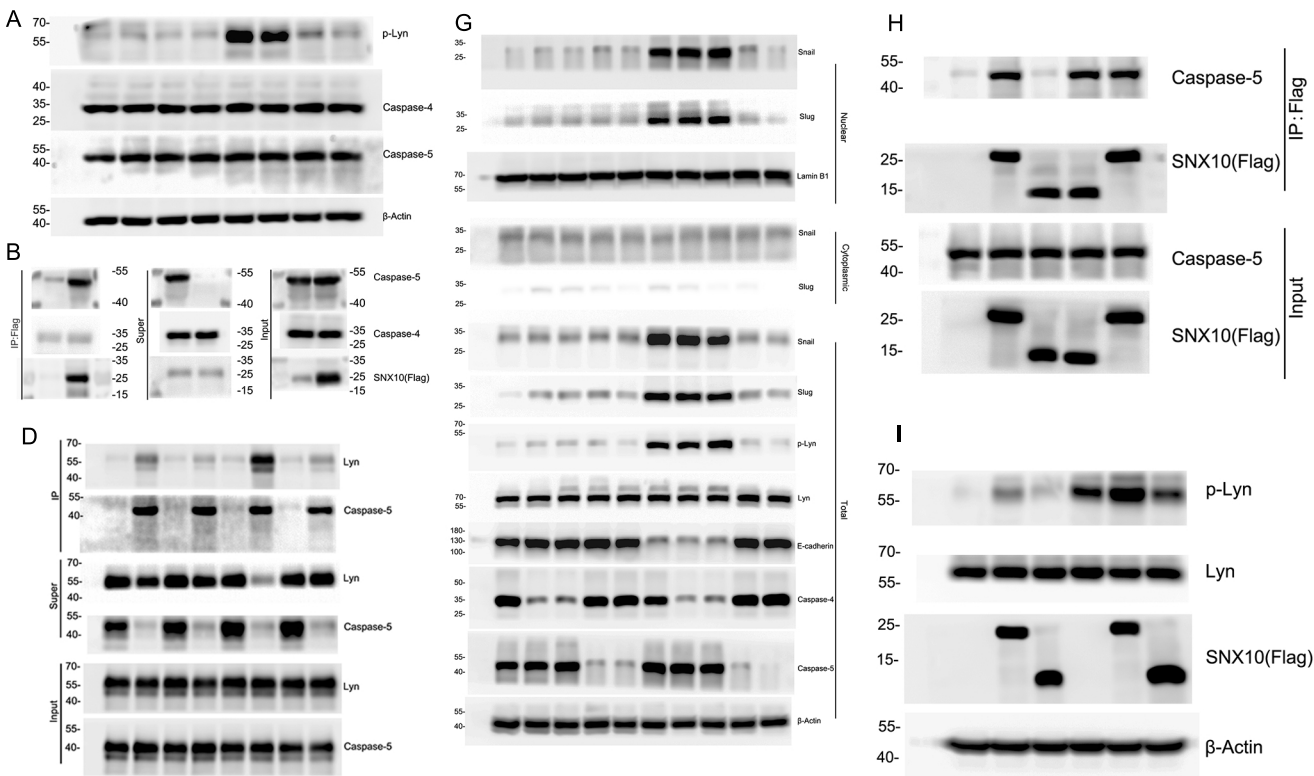

**Figure 4**

Supplement: EMBJ-40-e108080-s009.pdf [file EMBJ-40-e108080-s009.pdf]
